# Supplementary material
Source: Springer Nature journal article supplement (https://www.springermedizin.de/resource/supplementary/13045_2012_284_MOESM1_ESM.pdf/9661040)

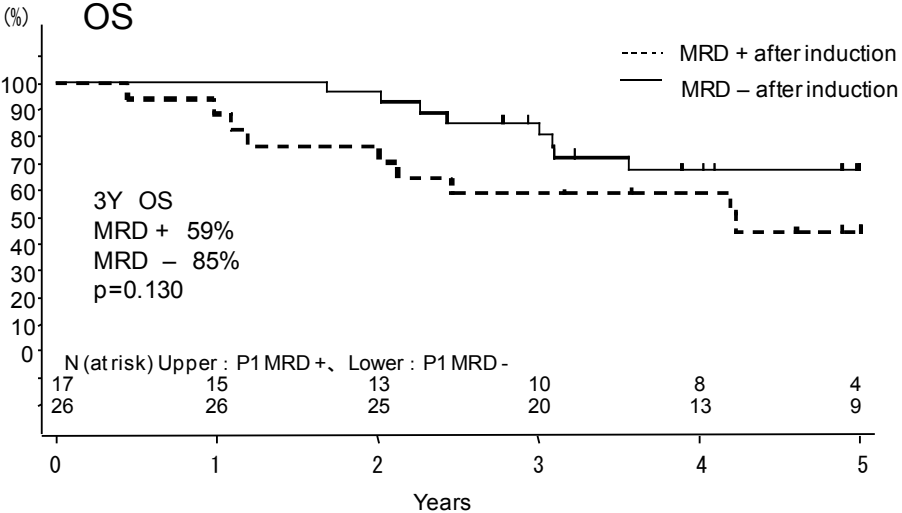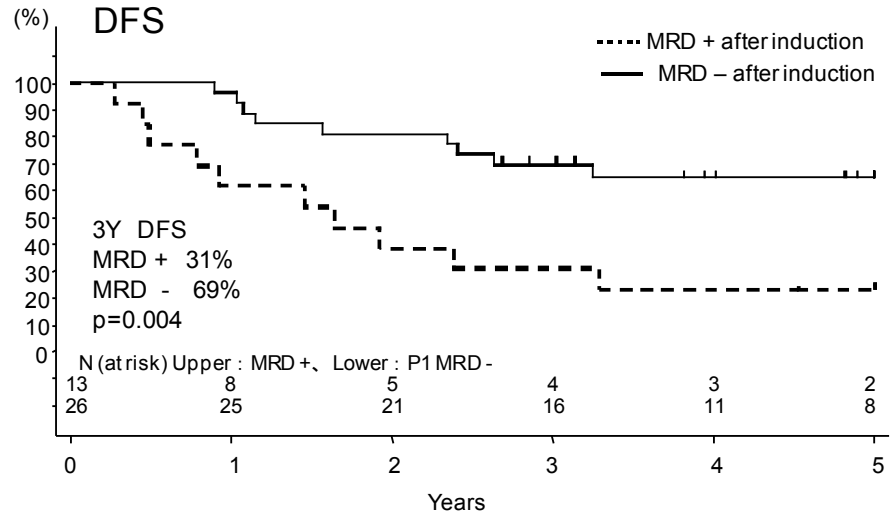

Supplement: MOESM1 [file 9661040]
